# Supplementary material for: The nuclear export protein XPO1 provides a peptide ligand for natural killer cells
Source: PubMed Central journal article supplement (PMC11343027; doi:10.1126/sciadv.ado6566), 2024-08-23
Supplement: sciadv.ado6566_sm.pdf [file sciadv.ado6566_sm.pdf]

Supplementary Materials for

**The nuclear export protein XPO1 provides a peptide ligand for natural killer cells**

Matthew D. Blunt *et al.*

Corresponding author: Salim I. Khakoo, [s.i.khakoo@soton.ac.uk](mailto:s.i.khakoo@soton.ac.uk)

*Sci. Adv.* **10**, eado6566 (2024)  
DOI: 10.1126/sciadv.ado6566

**The PDF file includes:**

Figs. S1 and S2  
Tables S3 to S7  
Legends for tables S1, S2, and S8

**Other Supplementary Material for this manuscript includes the following:**

Tables S1, S2, and S8

**Supplementary figure S1: KIR2DS2<sup>high</sup> NK cells are activated by cells expressing HLA-C\*0102 in combination with the NAPLVHATL peptide**

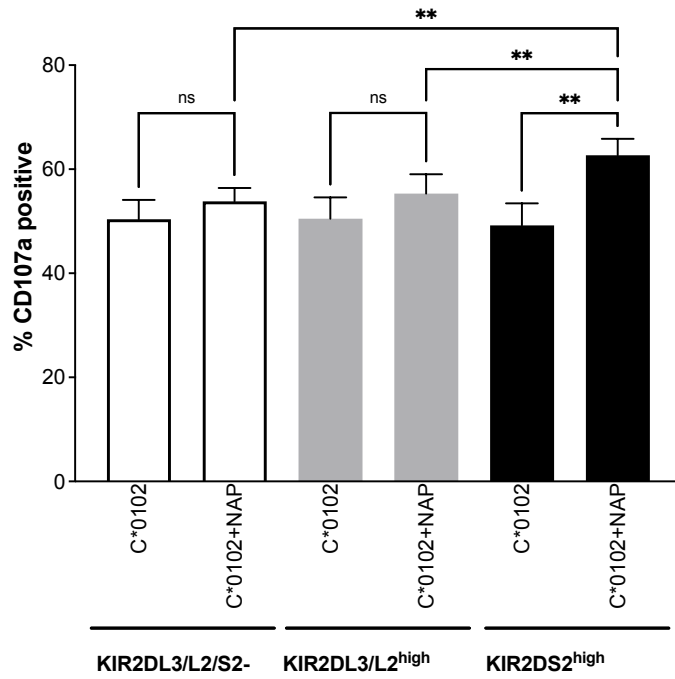

721.221 cells were transfected with HLA-C\*01:02 alone (C\*0102) or in combination with the peptide NAPLVHATL (C\*0102+NAP), and the cell lines used as targets for degranulation assays with IL-15 activated NK cells as effectors. CD107a expression on the indicated subpopulations of CD3-CD56<sup>+</sup> NK cells was assessed by flow cytometry against these targets. Summary results from the six donors tested are shown (\*\*p<0.01; ANOVA with Tukey's test for multiple comparisons).

**Figure S2: VAV1 phosphorylation of 2DS2-positive NKL cells by NAPLVHATL**

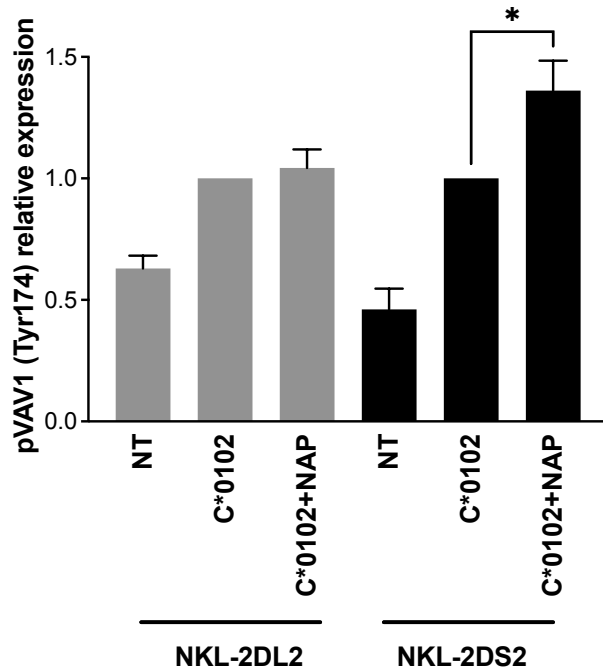

NKL-2DS2 or NKL-2DL2 cells were incubated with either no target (NT), 721.221:HLA-C\*01:02 (C\*0102) or 721.221:HLA-C\*0102+NAPLVHATL (C\*0102+NAP) cells for 5 minutes and assessed for Vav1 (Tyr174) phosphorylation by immunoblotting, quantified using the ChemiDoc-It Imaging system. Means and standard deviations and standard errors are shown. The NAPLVHATL induces activation of NKL-2DS2 cells but does not change the level of activation of NKL-2DL2 cells (\* $p < 0.05$ : paired t-test).

**Supplementary Tables:**

**Supplementary Table S1: Peptides identified by mass spectrometry from Huh7 and Huh7:C1 cells** (accompanying xls file)

**Supplementary Table S2: Quantitation of peptides eluted from Huh7 and Huh7:C1 cells** (accompanying xls file)

**Supplementary Table S3: Western blot densitometry ratios of pVav1/Vav1 in NKL-2DS2 cells following incubation with the different peptides in Figure 1F**

| <b>Experiment</b> | <b>No target</b> | <b>No peptide</b> | <b>VAPWNSDAL</b> | <b>LNPSVAATL</b> | <b>NAPLVHATL</b> |
|-------------------|------------------|-------------------|------------------|------------------|------------------|
| 1                 | 0.437            | 0.86158           | 1.274471         | 3.04495          | 5.520958         |
| 2                 | 0.239377         | 1.74814           | 1.922124         | 2.844377         | 2.801711         |
| 3                 | 0.325415         | 1.582443          | 1.1894527        | 3.762356         | 3.12053          |

**Supplementary Table S4: Western blot densitometry ratios of pSyk/Syk in NKL-2DS2 cells following incubation with the different peptides in Figure 1G**

| <b>Experiment</b> | <b>No target</b> | <b>No peptide</b> | <b>VAPWNSDAL</b> | <b>LNPSVAATL</b> | <b>NAPLVHATL</b> |
|-------------------|------------------|-------------------|------------------|------------------|------------------|
| 1                 | 1.808348         | 1.440003          | 2.231815         | 5.684421         | 5.099912         |
| 2                 | 0.366667         | 0.655251          | 0.723082         | 3.968966         | 3.689665         |
| 3                 | 0.8953106        | 0.8542156         | 1.8346883        | 3.426789         | 4.42731          |

**Supplementary Table S5: CD107a degranulation on CD3-CD56+ NK cells for Figure 3A and Figure S1.** Donors were tested against 721.221 cells expressing HLA-C\*0102 (C\*0102) or HLA-C\*0102 plus NAPLVHATL (C\*0102+ NAPLVHATL)

| Sub-population:<br>Target: | KIR2DL3/L2/S2-<br>negative |                      | KIR2DL3/2hi |                      | KIR2DS2hi |                      |
|----------------------------|----------------------------|----------------------|-------------|----------------------|-----------|----------------------|
|                            | C*0102                     | C*0102+<br>NAPLVHATL | C*0102      | C*0102+<br>NAPLVHATL | C*0102    | C*0102+<br>NAPLVHATL |
| <b>Donor 1</b>             | 31.03                      | 44.23                | 26.46       | 47.26                | 36.03     | 61.73                |
| <b>Donor 1</b>             | 31.83                      | 46.23                | 26.66       | 46.36                | 37.03     | 62.33                |
| <b>Donor 2</b>             | 40.89                      | 44.39                | 44.18       | 36.88                | 27.46     | 44.76                |
| <b>Donor 2</b>             | 39.29                      | 43.69                | 45.98       | 35.58                | 30.06     | 44.96                |
| <b>Donor 3</b>             | 55.4                       | 56.2                 | 52.15       | 57.45                | 62.73     | 64.73                |
| <b>Donor 3</b>             | 54.3                       | 55.6                 | 52.85       | 57.55                | 54.63     | 66.03                |
| <b>Donor 4</b>             | 57.49                      | 57.69                | 59.51       | 60.01                | 55.04     | 60.74                |
| <b>Donor 5</b>             | 58.11                      | 63.21                | 58.97       | 69.17                | 52.63     | 70.63                |
| <b>Donor 5</b>             | 56.51                      | 57.91                | 59.27       | 61.87                | 55.23     | 65.73                |
| <b>Donor 6</b>             | 65.1                       | 69.6                 | 64.6        | 72.9                 | 62.65     | 82.05                |
| <b>Donor 6</b>             | 64.2                       | 53.4                 | 64.9        | 63.6                 | 67.85     | 65.75                |

**Supplementary Table S6: Western blot densitometry data of pVav1 (Tyr174) levels in NKL-2DL2 or NKL-2DS2 cells incubated with 721.221 cells expressing HLA-C\*0102 (C\*0102) or expressing HLA-C\*0102 plus NAPLVHATL as shown in Figure 3C and Figure S2.** Data are normalised to C\*0102 cells.

| Experiment | NKL-2DL2     |        |                      | Experiment | NKL-2DS2     |        |                      |
|------------|--------------|--------|----------------------|------------|--------------|--------|----------------------|
|            | No<br>Target | C*0102 | C*0102+<br>NAPLVHATL |            | No<br>Target | C*0102 | C*0102+<br>NAPLVHATL |
| 1          | 0.605537     | 1      | <b>0.935796</b>      | 2          | 0.47808      | 1      | 1.306768             |
| 3          | 0.738612     | 1      | <b>0.948743</b>      | 4          | 0.424295     | 1      | 1.073959             |
| 5          | 0.678817     | 1      | <b>1.02544</b>       | 6          | 0.254012     | 1      | 1.814331             |
| 7          | 0.495923     | 1      | <b>1.263223361</b>   | 8          | 0.235058     | 1      | 1.132993             |
|            |              |        |                      | 9          | 0.789061     | 1      | 1.649083             |
|            |              |        |                      | 10         | 0.585369     | 1      | 1.190711             |

**Supplementary Table S7: Cytotoxicity data for Figure 3F showing the specific cytotoxicity of NKL-2DS2 and NKL-2DL2 against Huh7:C1 cells transfected with siRNA to XPO1 or control siRNA**

| E:T ratio | NKL-2DS2      |            | NKL-2DL2      |       |            |       |       |       |       |      |      |       |       |       |       |       |
|-----------|---------------|------------|---------------|-------|------------|-------|-------|-------|-------|------|------|-------|-------|-------|-------|-------|
|           | Control siRNA | XPO1 siRNA | Control siRNA |       | XPO1 siRNA |       |       |       |       |      |      |       |       |       |       |       |
| 0.5:1     | 22.9          | 23.3       | 14.59         | 16.96 | 14.67      | 13.38 | 9.78  | 9.28  | 13.4  | 14.8 | 2.19 | 4.26  | 8.57  | 8.08  | 4.08  |       |
| 1:1       | 36.4          | 34.5       | 44.29         | 24.19 | 25.86      | 24.88 | 31.31 | 18.58 | 19.08 | 12.4 | 13   | 36.09 | 4.16  | 10.67 | 8.68  | 32.01 |
| 5:1       | 58.7          | 59.2       | 45.39         | 53.59 | 55.26      | 52.67 | 51.08 | 44.38 | 44.78 | 42.1 | 41.7 | 41.29 | 10.29 | 37.97 | 35.58 | 37.11 |

**Supplementary Table S8: Cibersort X analysis of hepatocellular carcinoma samples  
from TCGA LIHC dataset (accompanying xls file)**
